# Supplementary material for: Triple-shelled CuO/CeO2 hollow nanospheres derived from metal–organic frameworks as highly efficient catalysts for CO oxidation
Source: Royal Society of Chemistry journal article supplement (doi:10.1039/c9nj04244j), 2019-01-01
Supplement: c9nj04244j1.pdf [file c9nj04244j1.pdf]

## Supporting Information

Triple-shelled CuO/CeO<sub>2</sub> hollow nanospheres derived from metal-organic frameworks as highly efficient catalysts for CO oxidation

Xue-Zhi Song, Qiao-Feng Su, Shao-Jie Li, Si-Hang Liu, Nan Zhang, Yu-Lan Meng, Xi Chen and Zhenquan Tan\*

State Key Laboratory of Fine Chemicals, School of Chemical Engineering, Dalian University of Technology, 2 Dagong Road, Liaodongwan New District, Panjin 124221, Liaoning, P. R. China

\*tanzq@dlut.edu.cn

Text S1: The detailed H<sub>2</sub>-TPR+N<sub>2</sub>O experiments and TOF calculation

H<sub>2</sub> temperature-programmed reduction (H<sub>2</sub>-TPR) and N<sub>2</sub>O chemisorption experiments were performed on a PCA-140 instrument. Prior to reduction, the catalyst (200 mg) was pretreated in an Ar flow (30 mL/min) from room temperature to 500 °C at a rate of 20 °C/min, and the temperature was then maintained at 500 °C for 1 h. The H<sub>2</sub>-TPR+N<sub>2</sub>O chemisorption process consists of three sequential steps:

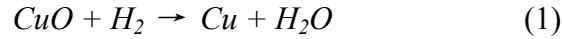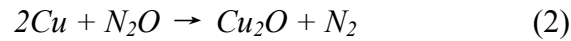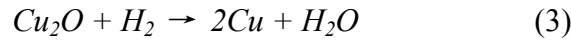

Step 1 represents the reduction of CuO in the catalysts. A flow of 5% H<sub>2</sub>/N<sub>2</sub> (30 mL/min) was used as the reducing agent, and the temperature was increased from room temperature to 300 °C at a heating rate of 5 °C/min. The amount of H<sub>2</sub> consumption ( $A_1$ ) corresponds to the total amount of CuO in the catalysts. Step 2 represents the oxidation of surface Cu to Cu<sub>2</sub>O by N<sub>2</sub>O, which is a typical method for evaluating the dispersion and crystallite size of Cu catalysts. This step was initiated after the reduced catalyst, which was cooled to 60 °C in flowing Ar (30 mL/min) for 30 min; the catalysts were then oxidized at 60 °C for 1 h in pure N<sub>2</sub>O flowing at 30 mL/min. Subsequently, the residual N<sub>2</sub>O was removed using an Ar stream (30 mL/min) at room temperature for 1 h. Step 3 represents the reduction of Cu<sub>2</sub>O surface species. The catalysts were reduced under a 5% H<sub>2</sub>/N<sub>2</sub> atmosphere (30 mL/min) from room temperature to 300 °C with a heating rate of 5 °C/min. The amount of H<sub>2</sub> consumed ( $A_2$ ) corresponds to twice the amount of surface Cu in the catalyst. The dispersion ( $D$ ) of CuO was calculated as follows:<sup>Ref. S1</sup>

$$D_{\text{CuO}} = 2A_2/A_1 \times 100\% \quad (4)$$

Concerning the intrinsic activity, turnover frequencies (TOFs) were calculated on the basis of the following definitions:

$$\text{TOF} [\text{s}^{-1}] = X_{\text{CO}} F_{\text{CO}} \frac{5M_{\text{Cu}}}{4m_{\text{cat}} X_{\text{CuO}} D_{\text{CuO}}} \quad (5)$$

Where  $X_{\text{CO}}$  is the CO conversion at a given temperature,  $F_{\text{CO}}$  is the flow rate of CO in

mol/s,  $m_{\text{cat}}$  is the amount of catalyst,  $X_{\text{CuO}}$  is the CuO loading in the catalyst,  $D_{\text{CuO}}$  is the dispersion of CuO and  $M_{\text{Cu}}$  is the molar mass of Cu (63.546 g/mol). *TOF* reflects the conventional calculation of *TOF* based on the metal dispersion.

(Ref. S1) R. Kang, X. Wei, F. Bin, Z. Wang, Q. Hao and B. Dou, Reaction mechanism and kinetics of CO oxidation over a CuO/Ce<sub>0.75</sub>Zr<sub>0.25</sub>O<sub>2-δ</sub> catalyst. *Appl. Catal. A Gen.*, 2018, **565**, 46-58.

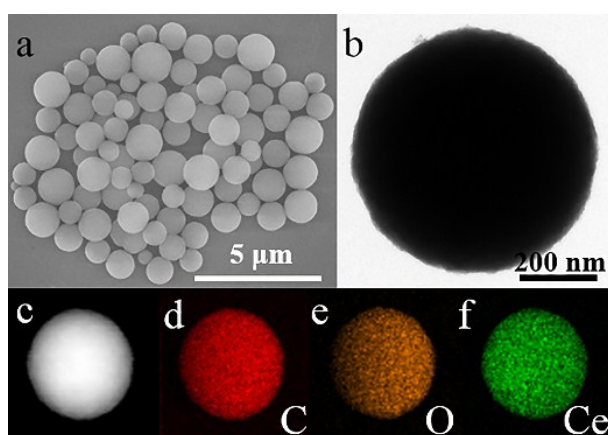

**Fig. S1** SEM image, TEM image and corresponding elemental mapping images of solid Ce-BPDC microspheres precursors.

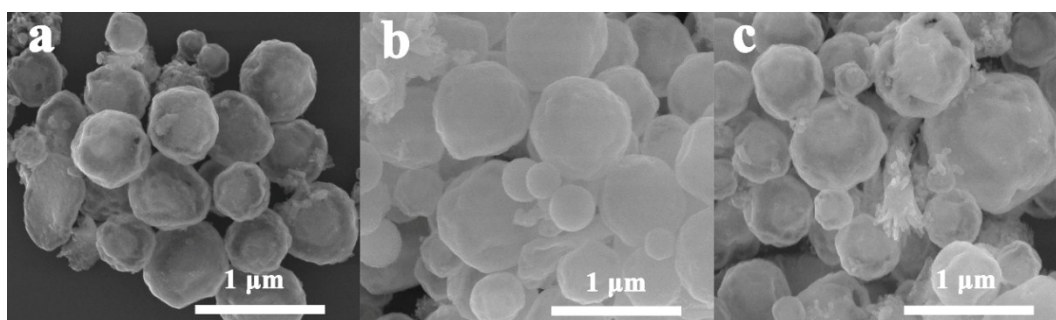

**Fig. S2** SEM images of CuO/CeO<sub>2</sub>-4% (a), CuO/CeO<sub>2</sub>-12% (b) and CuO/CeO<sub>2</sub>-16% (c).

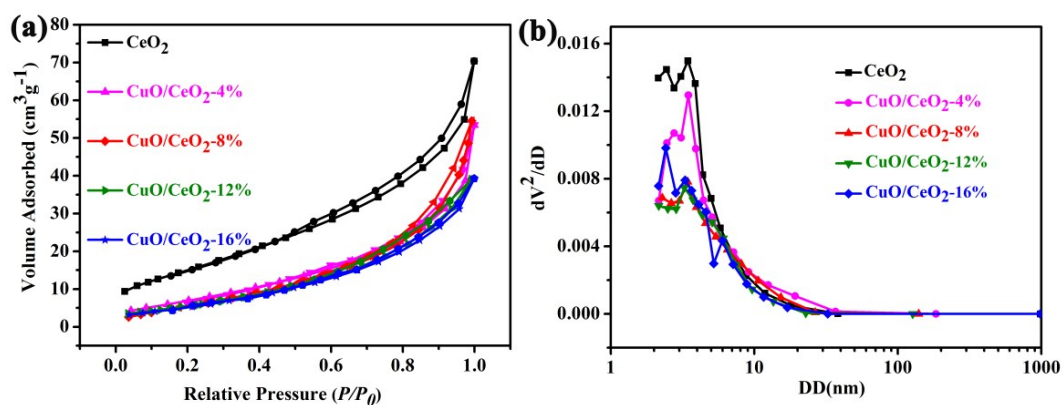

**Fig. S3** N<sub>2</sub>-adsorption-desorption isotherms (a) and corresponding pore size distributions curves (b) of the CeO<sub>2</sub> support and CuO/CeO<sub>2</sub>-X% samples.

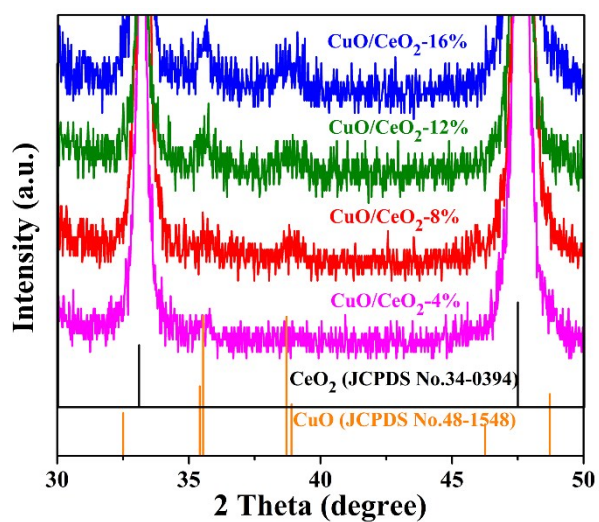

**Fig. S4** The regional magnification of XRD patterns of the support CeO<sub>2</sub> and CuO/CeO<sub>2</sub>-X% samples.

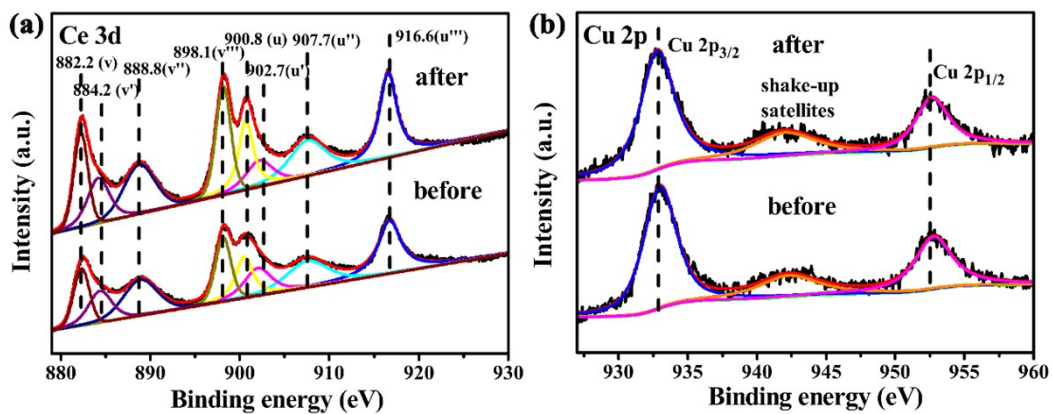

**Fig. S5** XPS spectra of Ce 3d (a) and Cu 2p (b) of the CuO/CeO<sub>2</sub>-8% before and after catalysis.

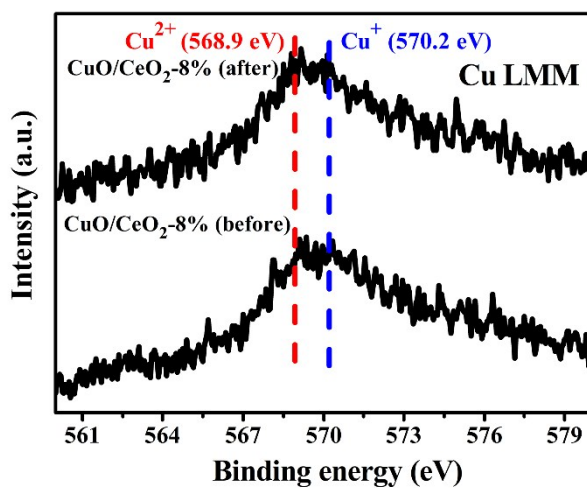

**Fig. S6** Auger lines of Cu LMM in the CuO/CeO<sub>2</sub>-8% sample before and after catalysis.

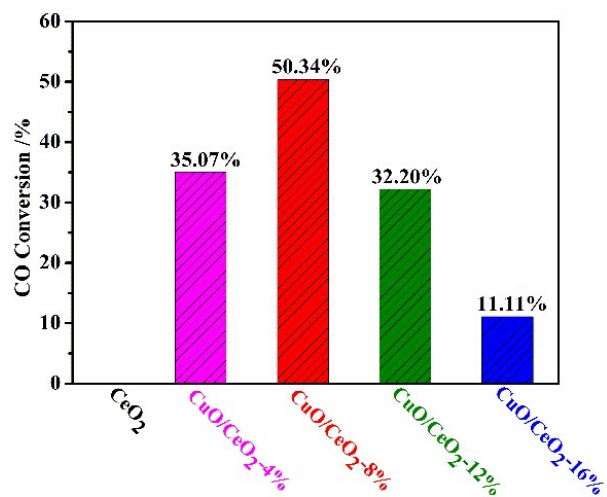

**Fig. S7** CO conversion at 110 °C for the bare CeO<sub>2</sub> and CuO/CeO<sub>2</sub>-X% samples.

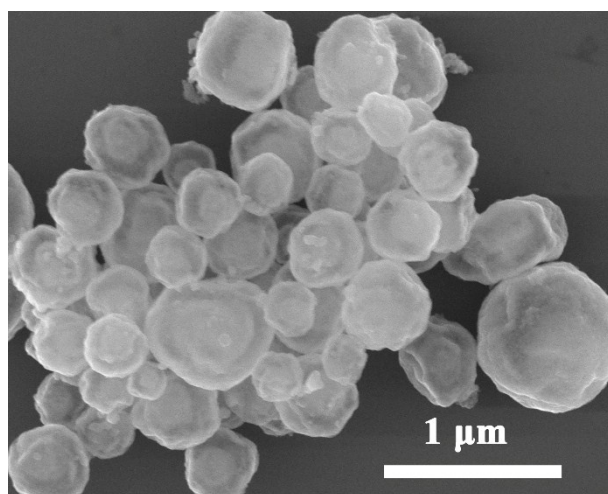

**Fig. S8** SEM image of CuO/CeO<sub>2</sub>-8% after catalysis.

**Table S1** ICP analytical results of CuO/CeO<sub>2</sub>-X% samples.

| samples                   | Cu (wt%) |
|---------------------------|----------|
| CuO/CeO <sub>2</sub> -4%  | 4.11     |
| CuO/CeO <sub>2</sub> -8%  | 7.97     |
| CuO/CeO <sub>2</sub> -12% | 11.44    |
| CuO/CeO <sub>2</sub> -16% | 12.73    |

**Table S2** Textural (BET) characteristics of bare CeO<sub>2</sub> and CuO/CeO<sub>2</sub>-X% samples.

| sample                    | BET Surface Area (m <sup>2</sup> /g) | Pore Volume (cm <sup>3</sup> /g) | Average Pore Size (nm) | Pore Size distribution |
|---------------------------|--------------------------------------|----------------------------------|------------------------|------------------------|
| CeO <sub>2</sub>          | 57.03                                | 0.12                             | 6.6                    | 2-4 nm                 |
| CuO/CeO <sub>2</sub> -4%  | 32.36                                | 0.14                             | 10.3                   | 2-4 nm                 |
| CuO/CeO <sub>2</sub> -8%  | 24.89                                | 0.09                             | 8.9                    | 2-4 nm                 |
| CuO/CeO <sub>2</sub> -12% | 22.66                                | 0.07                             | 7.1                    | 2-4 nm                 |
| CuO/CeO <sub>2</sub> -16% | 21.05                                | 0.07                             | 7.4                    | 2-4 nm                 |

**Table S3** Relative contents of Cu<sup>+</sup> and Ce<sup>3+</sup> of CuO/CeO<sub>2</sub>-8% sample before and after catalysis analyzed by XPS

| catalysts                         | Cu <sup>+</sup> (%) | Ce <sup>3+</sup> /(Ce <sup>3+</sup> +Ce <sup>4+</sup> ) (%) |
|-----------------------------------|---------------------|-------------------------------------------------------------|
| CuO/CeO <sub>2</sub> -8% (before) | 30.25               | 21.07                                                       |
| CuO/CeO <sub>2</sub> -8% (after)  | 25.30               | 17.31                                                       |

**Table S4** Dispersion and content of CuO, CO conversion and TOF values for CuO/CeO<sub>2</sub>-X% catalysts.

| Catalysts                 | $D_{\text{CuO}}^{\text{a}}$ (%) | Cu <sup>b</sup> (wt %) | CuO (wt %) | CO Conversion <sup>c</sup> (%) | TOF (s <sup>-1</sup> ) <sup>d</sup> |
|---------------------------|---------------------------------|------------------------|------------|--------------------------------|-------------------------------------|
| CuO/CeO <sub>2</sub> -4%  | 63.42                           | 4.11                   | 4.89       | 8.28                           | $1.58 \times 10^{-3}$               |
| CuO/CeO <sub>2</sub> -8%  | 43.33                           | 7.97                   | 9.06       | 11.42                          | $1.72 \times 10^{-3}$               |
| CuO/CeO <sub>2</sub> -12% | 51.31                           | 11.44                  | 12.51      | 9.44                           | $8.68 \times 10^{-4}$               |
| CuO/CeO <sub>2</sub> -16% | 76.34                           | 12.73                  | 13.73      | 1.38                           | $7.77 \times 10^{-5}$               |

<sup>a</sup>CuO dispersion ( $D_{\text{CuO}}$ ) was determined by H<sub>2</sub>-TPR + N<sub>2</sub>O chemisorption;<sup>Ref. S1</sup>

<sup>b</sup>Cu concentration determined by ICP-OES;

<sup>c</sup>Reaction temperature is 90 °C;

<sup>d</sup>TOF represents the turnover frequency calculated by equation (5).

**Table S5** Surface elemental composition of bare CeO<sub>2</sub> and CuO/CeO<sub>2</sub>-X% determined by XPS.

| catalysts                 | Surface composition (at%) |       |       |
|---------------------------|---------------------------|-------|-------|
|                           | Cu 2p                     | Ce 3d | O 1s  |
| CeO <sub>2</sub>          | -                         | 25.85 | 74.15 |
| CuO/CeO <sub>2</sub> -4%  | 8.93                      | 16.50 | 74.57 |
| CuO/CeO <sub>2</sub> -8%  | 10.25                     | 17.80 | 71.95 |
| CuO/CeO <sub>2</sub> -12% | 11.16                     | 17.28 | 71.56 |
| CuO/CeO <sub>2</sub> -16% | 12.06                     | 18.28 | 69.66 |



**Table S6** Comparison of the activity for CO oxidation over different ceria-based catalysts.

| Catalysts                                        | Morphology                                              | Temperature                     |                                                                                                          | References                                              |
|--------------------------------------------------|---------------------------------------------------------|---------------------------------|----------------------------------------------------------------------------------------------------------|---------------------------------------------------------|
|                                                  |                                                         | (°C) with 100%<br>CO Conversion | Reaction condition                                                                                       |                                                         |
| CuO/CeO <sub>2</sub> -8%                         | triple-shelled hollow<br>nanospheres                    | 130                             | 1%CO/21%O <sub>2</sub> /78%N <sub>2</sub> ,<br>60000 mL·g <sub>cat</sub> <sup>-1</sup> ·h <sup>-1</sup>  | This work                                               |
| AuPd/CeO <sub>2</sub>                            | multi-shelled hollow<br>spheres                         | 145                             | 1%CO/21%O <sub>2</sub> /78%N <sub>2</sub> ,<br>30000 mL·g <sub>cat</sub> <sup>-1</sup> ·h <sup>-1</sup>  | Dalton Trans.,<br>2017, 46, 1634-<br>1644               |
| Au@CeO <sub>2</sub>                              | core-shell<br>submicrospheres                           | 155                             | 1%CO/1.6%O <sub>2</sub> /97.4%He,<br>15000 mL·g <sub>cat</sub> <sup>-1</sup> ·h <sup>-1</sup>            | Energy Environ.<br>Sci., 2012, 5,<br>8937-8941          |
| 20CuCe-L<br>(copper-ceria)                       | Litchi-peel-like<br>hierarchical hollow<br>microspheres | 120                             | 1%CO/10%O <sub>2</sub> /89%Ar,<br>60000 mL·g <sub>cat</sub> <sup>-1</sup> ·h <sup>-1</sup>               | Nanoscale,<br>2018,10, 22775-<br>22786                  |
| 1CuCe-NR<br>(copper oxide<br>deposited on ceria) | nanorod                                                 | 122                             | 1%CO/20%O <sub>2</sub> /79%N <sub>2</sub> ,<br>80000 mL·g <sub>cat</sub> <sup>-1</sup> ·h <sup>-1</sup>  | ACS Catal., 2017,<br>7, 1313-1329                       |
| CuO@CeO <sub>2</sub> -50%                        | --                                                      | 125                             | 1%CO balanced in dry<br>air, 20000 mL·g <sub>cat</sub> <sup>-1</sup> ·h <sup>-1</sup>                    | J. Mater. Chem.<br>A, 2017, 5,<br>13565-13572           |
| CuO@CeO <sub>2</sub> -0.05                       | spiny yolk@shell<br>cubes                               | 120                             | 1%CO/20%O <sub>2</sub> /79%N <sub>2</sub> ,<br>60000 mL·g <sub>cat</sub> <sup>-1</sup> ·h <sup>-1</sup>  | Adv. Funct.<br>Mater., 2018,<br>1802559                 |
| Au/CeO <sub>2</sub> @UiO-66                      | core-shell<br>microspherical beads                      | 100                             | 1%CO/21%O <sub>2</sub> /78%N <sub>2</sub> ,<br>120000 mL·g <sub>cat</sub> <sup>-1</sup> ·h <sup>-1</sup> | J. Mater. Chem.<br>A, 2017, 5,<br>13966-13970           |
| 300 °C-CeO <sub>2</sub> -CuO                     | porous/hollow rod                                       | 98                              | 1%CO/10%O <sub>2</sub> /89%N <sub>2</sub> ,<br>60000 mL·g <sub>cat</sub> <sup>-1</sup> ·h <sup>-1</sup>  | ACS Appl. Mater.<br>Interfaces, 2017,<br>9, 39594-39601 |
